# Supplementary material for: Cytotoxicity of nimbolide towards multidrug-resistant tumor cells and hypersensitivity via cellular metabolic modulation
Source: PubMed Central journal article supplement (PMC6254660; doi:10.18632/oncotarget.26299), 2018-11-06
Supplement: oncotarget-09-35762-s001.pdf [file oncotarget-09-35762-s001.pdf]

## **Cytotoxicity of nimbolide towards multidrug-resistant tumor cells and hypersensitivity via cellular metabolic modulation**

### **SUPPLEMENTARY MATERIALS**

**Supplementary Table 1: The most significantly deregulated genes in CCRF-CEM cells after nimbolide treatment.** See Supplementary\_Table\_1

**Supplementary Table 2: The most significantly deregulated genes in CEM/ADR5000 cells after nimbolide treatment.** See Supplementary\_Table\_2
